# Supplementary material
Source: HighWire-hosted journal article supplement (https://erj.ersjournals.com/content/59/2/2102697)

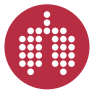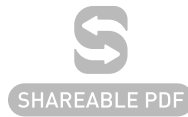

# Remote patient monitoring in COVID 19: a critical appraisal

Henri Gruwez <sup>1,2,3,4</sup>, Emma Bakelants<sup>4,5</sup>, Pauline Dreesen<sup>1</sup>, Jolien Broekmans<sup>4</sup>, Maarten Criel<sup>5</sup>, Michiel Thomeer <sup>1,5</sup>, Pieter Vandervoort<sup>1,2</sup> and David Ruttens<sup>1,5</sup>

<sup>1</sup>Faculty of Medicine and Life Science, Hasselt University, Hasselt, Belgium. <sup>2</sup>Dept of Cardiology, Ziekenhuis Oost Limburg, Genk, Belgium. <sup>3</sup>Dept of Cardiovascular Sciences, University of Leuven, Leuven, Belgium. <sup>4</sup>Faculty of Medicine, University of Leuven, Leuven, Belgium. <sup>5</sup>Dept of Respiratory Medicine, Ziekenhuis Oost Limburg, Genk, Belgium.

Corresponding author: David Ruttens ([david.ruttens@zol.be](mailto:david.ruttens@zol.be))

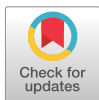

Shareable abstract (@ERSpublications)

Is there any evidence for #telemonitoring in #COVID19? **Read more:** <https://bit.ly/3p1YXBi>

**Cite this article as:** Gruwez H, Bakelants E, Dreesen P, *et al.* Remote patient monitoring in COVID 19: a critical appraisal. *Eur Respir J* 2022; 59: 2102697 [DOI: 10.1183/13993003.02697-2021].

This single-page version can be shared freely online.

Copyright ©The authors 2022.

This version is distributed under the terms of the Creative Commons Attribution Non-Commercial Licence 4.0. For commercial reproduction rights and permissions contact [permissions@ersnet.org](mailto:permissions@ersnet.org)

Received: 12 Oct 2021  
Accepted: 20 Nov 2021

*To the Editor:*

With great interest, we read the article by GRUTTERS *et al.* [1], in which they share their results of the largest patient cohort of coronavirus disease 2019 (COVID-19) home monitoring to date. Based on these results, remote patient monitoring (RPM) was praised and was claimed as a tool to reduce the hospital stay of COVID-19 patients by 5 days.

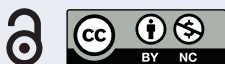

Supplement: inline-supplementary-material-1 [file inline-supplementary-material-1.pdf]
